# Supplementary material for: Therapeutic efficacy of dimethyl fumarate in relapsing-remitting multiple sclerosis associates with ROS pathway in monocytes
Source: PubMed Central journal article supplement (PMC6626021; doi:10.1038/s41467-019-11139-3), 2019-07-12
Supplement: 41467_2019_11139_MOESM1_ESM.pdf [file 41467_2019_11139_MOESM1_ESM.pdf]

Therapeutic efficacy of dimethyl fumarate in relapsing-remitting multiple sclerosis associates with ROS pathway in monocytes

Carlström et al

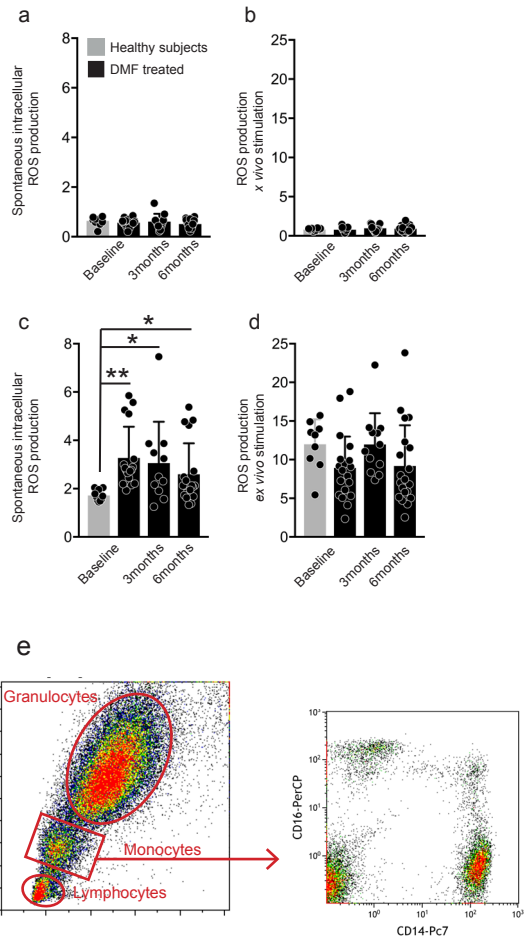

Supplementary Fig. 1. ROS generation in granulocytes and lymphocytes. (a, b) ROS generation in lymphocytes from healthy subjects or DMF treated patients. (c, d) ROS generation in granulocytes from healthy subjects or DMF treated patients. (e) Sequential gating strategy. Graphs show means and S.D.. All analysis between healthy controls and patients are performed with Welch's t test. \* $P < 0.05$ , \*\* $P < 0.01$

**Supplementary Table 1. Canonical pathways affected by differentially expressed genes in CD14+ monocytes after 6 months of treatment with DMF.**

| Ingenuity Canonical Pathway                                                    | -LOG(p-val) | Ratio | Molecules                                                                | z-score |
|--------------------------------------------------------------------------------|-------------|-------|--------------------------------------------------------------------------|---------|
| Protein Ubiquitination Pathway                                                 | 3.42        | 0.042 | UBE2D4,PSMD10,DNAJC5,CUL2,PSMB2,BAG1,PSMA5,DNAJC10,UBE2E3,NEDD4L,ANAPC11 | NaN     |
| Thiosulfate Disproportionation III (Rhodanese)                                 | 3.37        | 0.667 | MOC53,TST                                                                | NaN     |
| Mechanisms of Viral Exit from Host Cells                                       | 2.84        | 0.098 | VPS25,ACTA2,LMNB1,TSG101                                                 | NaN     |
| NRF2-mediated Oxidative Stress Response                                        | 2.63        | 0.042 | MGST1,DNAJC5,NRAS,GAB1,ACTA2,DNAJC10,UBE2E3,TXN                          | NaN     |
| EIF2 Signaling                                                                 | 2.27        | 0.036 | RPL4,NRAS,RPL18A,GAB1,ACTA2,RPL17,RPS25,RPS2                             | 1.342   |
| FAK Signaling                                                                  | 2.17        | 0.051 | NRAS,CAPN11,GAB1,ACTA2,PTEN                                              | NaN     |
| Oxidative Phosphorylation                                                      | 1.99        | 0.046 | COX8A,SURF1,NDUFA81,ATP5MC3,NDUFA8                                       | 2.236   |
| Hypoxia Signaling in the Cardiovascular System                                 | 1.90        | 0.053 | UBE2D4,UBE2E3,LDHA,PTEN                                                  | NaN     |
| Role of Macrophages, Fibroblasts and Endothelial Cells in Rheumatoid Arthritis | 1.87        | 0.029 | WNT3A,NRAS,GAB1,CHP1,TLR8,FZD2,FCGR1A,FCGR3A/FCGR3B,PRSS1                | NaN     |
| Systemic Lupus Erythematosus Signaling                                         | 1.70        | 0.031 | SNRPN,LSMB,NRAS,CD40,GAB1,FCGR1A,FCGR3A/FCGR3B                           | NaN     |
| NF-kB Signaling                                                                | 1.65        | 0.033 | CSNK2A2,NRAS,CD40,GAB1,TLR8,TBK1                                         | 2.449   |
| UDP-D-xylose and UDP-D-glucuronate Biosynthesis                                | 1.62        | 0.500 | UGDH                                                                     | NaN     |
| $\beta$ -alanine Degradation I                                                 | 1.62        | 0.500 | ALDH6A1                                                                  | NaN     |
| Role of NFAT in Regulation of the Immune Response                              | 1.60        | 0.032 | NRAS,GAB1,CHP1,FCGR1A,FCGR3A/FCGR3B,GNNG7                                | NaN     |
| Fc $\gamma$ Receptor-mediated Phagocytosis in Macrophages and Monocytes        | 1.59        | 0.043 | ACTA2,FCGR1A,FCGR3A/FCGR3B,PTEN                                          | 1.342   |
| Fatty Acid $\alpha$ -oxidation                                                 | 1.55        | 0.091 | TMLHE,ALDH2                                                              | 1       |
| Melanoma Signaling                                                             | 1.55        | 0.055 | NRAS,GAB1,PTEN                                                           | NaN     |
| D-myo-inositol (1,4,5,6)-Tetraakisphosphate Biosynthesis                       | 1.54        | 0.035 | PPP1R7,PPTC7,PPP4R1,PPP4C,PTEN                                           | NaN     |
| D-myo-inositol (3,4,5,6)-tetraakisphosphate Biosynthesis                       | 1.54        | 0.035 | PPP1R7,PPTC7,PPP4R1,PPP4C,PTEN                                           | 2.236   |
| Prostate Cancer Signaling                                                      | 1.53        | 0.041 | NRAS,GAB1,NKX3-1,PTEN                                                    | NaN     |
| Hereditary Breast Cancer Signaling                                             | 1.52        | 0.035 | NRAS,GAB1,REC2,POLR2J,PTEN                                               | NaN     |
| Ovarian Cancer Signaling                                                       | 1.52        | 0.035 | WNT3A,NRAS,GAB1,FZD2,PTEN                                                | NaN     |
| Colorectal Cancer Metastasis Signaling                                         | 1.52        | 0.028 | WNT3A,NRAS,GAB1,TLR8,FZD2,PTGER4,GNNG7                                   | NaN     |
| Huntington's Disease Signaling                                                 | 1.50        | 0.028 | NSF,DNAJC5,CAPN11,GAB1,POLR2J,GNNG7,NAPB                                 | 1.89    |
| Phagosome Maturation                                                           | 1.48        | 0.034 | NSF,VPS18,ATP6V1C1,TSG101,NAPB                                           | NaN     |
| 3-phosphoinositide Biosynthesis                                                | 1.46        | 0.030 | GAB1,PPP1R7,PPTC7,PPP4R1,PPP4C,PTEN                                      | 2.449   |
| L-carnitine Biosynthesis                                                       | 1.45        | 0.333 | TM1LHE                                                                   | NaN     |
| Mouse Embryonic Stem Cell Pluripotency                                         | 1.41        | 0.038 | WNT3A,NRAS,GAB1,FZD2                                                     | 1       |
| 3-phosphoinositide Degradation                                                 | 1.39        | 0.032 | PPP1R7,PPTC7,PPP4R1,PPP4C,PTEN                                           | 2.236   |
| Endometrial Cancer Signaling                                                   | 1.38        | 0.047 | NRAS,GAB1,PTEN                                                           | NaN     |
| IL-2 Signaling                                                                 | 1.38        | 0.047 | CSNK2A2,NRAS,GAB1                                                        | NaN     |
| D-myo-inositol-5-phosphate Metabolism                                          | 1.35        | 0.031 | PPP1R7,PPTC7,PPP4R1,PPP4C,PTEN                                           | NaN     |
| Glioblastoma Multiforme Signaling                                              | 1.34        | 0.031 | WNT3A,NRAS,GAB1,FZD2,PTEN                                                | 2.236   |
| Phenylethylamine Degradation I                                                 | 1.33        | 0.250 | ALDH2                                                                    | 1       |
| Molybdenum Cofactor Biosynthesis                                               | 1.33        | 0.250 | MOC53                                                                    | NaN     |
| Paxillin Signaling                                                             | 1.33        | 0.035 | ITGA2B,NRAS,CAPN11,GAB1,ACTA2                                            | NaN     |
| Integrin Signaling                                                             | 1.31        | 0.027 | ITGA2B,NRAS,CAPN11,GAB1,ACTA2,PTEN                                       | 1.633   |

Supplementary Table 1. Canonical pathways affected by differentially expressed genes in CD14+ monocytes after 6 months of treatment with DMF.

DMF: Dimethyl fumarate.

Input gene list was based on differentially expressed genes with p-value < 0.01 and averageRMA > 4.

The table includes all canonical pathways from Ingenuity Pathway Analysis with Fisher's p-value < 0.05.

z-score: the activation z-score is used to infer likely activation states of upstream regulators (z-score > 2 corresponds to activation).

**Supplementary Table 2. Canonical pathways affected by differentially methylated genes in CD14+ monocytes after treatment with DN**

| Ingenuity Canonical Pathway                                      | -LOG(p-val) | Ratio | Molecules                                                                            | N mol | Group     | Cluster | ROS Score |
|------------------------------------------------------------------|-------------|-------|--------------------------------------------------------------------------------------|-------|-----------|---------|-----------|
| Growth Hormone Signaling                                         | 4,15        | 0,104 | PIK3R5,IGF1R,IRS2,RP56KA2,STAT3,PRKCZ,RP56KC1,PRKCB                                  | 8     | M3 vs. M6 | 2       | 0         |
| FLT3 Signaling in Hematopoietic Progenitor Cells                 | 3,99        | 0,099 | PIK3R5,STAT2,IRS2,MAPK13,RP56KA2,STAT3,CREB5,INPP5D                                  | 8     | M3 vs. M6 | 1       | 0         |
| Melanocyte Development and Pigmentation Signaling                | 2,93        | 0,078 | GNAS,PRKAG2,PIK3R5,IRS2,RP56KA2,CREB5,RP56KC1                                        | 7     | M3 vs. M6 | 1       | 0         |
| Dopamine-DARPP32 Feedback in cAMP Signaling                      | 2,90        | 0,062 | PRKG1,GNAS,PPP1R1B,CSNK1G3,PPM1L,PRKAG2,CREB5,PRKCZ,PRKCB                            | 9     | M3 vs. M6 | 3       | 0         |
| mTOR Signaling                                                   | 2,72        | 0,054 | PPM1L,PRKAG2,PIK3R5,RPTOR,IRS2,RP56KA2,PRKCZ,PLD1,RP56KC1,PRKCB                      | 10    | M3 vs. M6 | 1       | 0         |
| Tec Kinase Signaling                                             | 2,70        | 0,058 | LCK,GNAS,GNAS15,PIK3R5,STAT2,IRS2,STAT3,PRKCZ,PRKCB                                  | 9     | M3 vs. M6 | 2       | 0         |
| IL-15 Signaling                                                  | 2,67        | 0,081 | LCK,PIK3R5,IRS2,IL6,MAPK13,STAT3                                                     | 6     | M3 vs. M6 | 1       | 0,17      |
| IL-3 Signaling                                                   | 2,47        | 0,074 | PIK3R5,IRS2,STAT3,PRKCZ,INPP5D,PRKCB                                                 | 6     | M3 vs. M6 | 2       | 0         |
| Gap Junction Signaling                                           | 2,45        | 0,053 | PRKG1,GNAS,CSNK1G3,PRKAG2,PIK3R5,IRS2,PRKCZ,GI1C1,PRKCB                              | 9     | M3 vs. M6 | 3       | 0         |
| Adrenomedullin signaling pathway                                 | 2,43        | 0,053 | PPARG,PRKG1,C3,GNAS,GNAS15,PRKAG2,PIK3R5,IRS2,MAPK13                                 | 9     | M3 vs. M6 | 1       | 0         |
| Renin-Angiotensin Signaling                                      | 2,43        | 0,064 | PRKAG2,PIK3R5,IRS2,MAPK13,STAT3,PRKCZ,PRKCB                                          | 7     | M3 vs. M6 | 2       | 0         |
| HGF Signaling                                                    | 2,39        | 0,063 | DOCK1,PIK3R5,IRS2,IL6,STAT3,PRKCZ,PRKCB                                              | 7     | M3 vs. M6 | 2       | 0,14      |
| Synaptic Long Term Depression                                    | 2,36        | 0,056 | PRKG1,GNAS,GNAS15,GRID2,PPM1L,IGF1R,PRKCZ,PRKCB                                      | 8     | M3 vs. M6 | 3       | 0         |
| PDGF Signaling                                                   | 2,34        | 0,070 | PIK3R5,IRS2,STAT3,INPP5D,PRKCB,PDGFRB                                                | 6     | M3 vs. M6 | 1       | 0         |
| Axonal Guidance Signaling                                        | 2,30        | 0,038 | GLI2,GNAS,PIK3R5,EPHA3,PRKCZ,ADAMTS2,DOCK1,EPHA6,GNAS15,GLI1,PRKAG2,NFATC2,BMP7,IR15 | 15    | M3 vs. M6 | 1       | 0         |
| Superpathway of Inositol Phosphate Compounds                     | 2,29        | 0,047 | ITPK1,MINPP1,LCK,TNS3,PPP1R1B,PPM1H,PIK3R5,IRS2,INPP5D,PDGFRB                        | 10    | M3 vs. M6 | 1       | 0         |
| G1q Signaling                                                    | 2,29        | 0,054 | GNAS,GNAS15,PIK3R5,NFATC2,IRS2,PRKCZ,PLD1,PRKCB                                      | 8     | M3 vs. M6 | 2       | 0         |
| Calcium-induced T Lymphocyte Apoptosis                           | 2,29        | 0,081 | LCK,NFATC2,PRKCZ,ORAI1,PRKCB                                                         | 5     | M3 vs. M6 | 3       | 0         |
| NGF Signaling                                                    | 2,28        | 0,060 | PIK3R5,TRIO,IRS2,RP56KA2,CREB5,PRKCZ,RP56KC1                                         | 7     | M3 vs. M6 | 1       | 0         |
| eNOS Signaling                                                   | 2,27        | 0,054 | AQPS,PRKG1,GNAS,PRKAG2,PIK3R5,IRS2,PRKCZ,PRKCB                                       | 8     | M3 vs. M6 | 2       | 0         |
| Thrombopoietin Signaling                                         | 2,26        | 0,079 | PIK3R5,IRS2,STAT3,PRKCZ,PRKCB                                                        | 5     | M3 vs. M6 | 2       | 0         |
| UVB-Induced MAPK Signaling                                       | 2,26        | 0,079 | PIK3R5,IRS2,MAPK13,PRKCZ,PRKCB                                                       | 5     | M3 vs. M6 | 2       | 0         |
| Corticotropin Releasing Hormone Signaling                        | 2,24        | 0,059 | GLI2,GNAS,PRKAG2,MAPK13,CREB5,PRKCZ,PRKCB                                            | 7     | M3 vs. M6 | 3       | 0         |
| CREB Signaling in Neurons                                        | 2,23        | 0,049 | GNAS,GNAS15,GRID2,PRKAG2,PIK3R5,IRS2,CREB5,PRKCZ,PRKCB                               | 9     | M3 vs. M6 | 3       | 0         |
| ERK/MAPK Signaling                                               | 2,21        | 0,049 | PPARG,DOCK1,PPM1L,PRKAG2,PIK3R5,IRS2,STAT3,CREB5,PRKCB                               | 9     | M3 vs. M6 | 1       | 0         |
| 3-phosphoinositide Biosynthesis                                  | 2,21        | 0,049 | ITPK1,MINPP1,LCK,TNS3,PPP1R1B,PPM1H,PIK3R5,IRS2,PDGFRB                               | 9     | M3 vs. M6 | 1       | 0         |
| IL-12 Signaling and Production in Macrophages                    | 2,13        | 0,056 | PPARG,PIK3R5,IRS2,MAPK13,PRKCZ,PRKCB,APOD                                            | 7     | M3 vs. M6 | 2       | 0         |
| Role of NFAT in Cardiac Hypertrophy                              | 2,11        | 0,047 | GNAS,PRKAG2,PIK3R5,IGF1R,IRS2,IL6,MAPK13,PRKCZ,PRKCB                                 | 9     | M3 vs. M6 | 2       | 0,11      |
| LXR/RXR Activation                                               | 2,07        | 0,061 | ECHS1,C3,NR1H3,IL6,IL1RAPL1,APOD                                                     | 6     | M3 vs. M6 | 1       | 0,33      |
| Insulin Receptor Signaling                                       | 2,04        | 0,054 | ASIC2,PRKAG2,PIK3R5,RPTOR,IRS2,PRKCZ,INPP5D                                          | 7     | M3 vs. M6 | 1       | 0         |
| IGF-1 Signaling                                                  | 2,03        | 0,060 | PRKAG2,PIK3R5,IGF1R,IRS2,STAT3,PRKCZ                                                 | 6     | M3 vs. M6 | 2       | 0         |
| Nitric Oxide Signaling in the Cardiovascular System              | 2,01        | 0,059 | PRKG1,PRKAG2,PIK3R5,IRS2,PRKCZ,PRKCB                                                 | 6     | M3 vs. M6 | 2       | 0         |
| Endothelin-1 Signaling                                           | 1,98        | 0,048 | GNAS,GNAS15,PIK3R5,IRS2,MAPK13,PRKCZ,PLD1,PRKCB                                      | 8     | M3 vs. M6 | 2       | 0         |
| IL-17A Signaling in Airway Cells                                 | 1,95        | 0,067 | PIK3R5,IRS2,IL6,MAPK13,STAT3                                                         | 5     | M3 vs. M6 | 1       | 0,20      |
| FGF Signaling                                                    | 1,90        | 0,065 | PIK3R5,IRS2,MAPK13,STAT3,CREB5                                                       | 5     | M3 vs. M6 | 1       | 0         |
| Role of NFAT in Regulation of the Immune Response                | 1,87        | 0,046 | LCK,GNAS,GNAS15,CSNK1G3,PIK3R5,NFATC2,IRS2,ORAI1                                     | 8     | M3 vs. M6 | 1       | 0         |
| Thrombin Signaling                                               | 1,87        | 0,046 | GNAS,GNAS15,PIK3R5,IRS2,MAPK13,ARHGFE10,PRKCZ,PRKCB                                  | 8     | M3 vs. M6 | 2       | 0         |
| 3-phosphoinositide Degradation                                   | 1,86        | 0,050 | ITPK1,MINPP1,TNS3,PPP1R1B,PPM1H,INPP5D,MTMR3                                         | 7     | M3 vs. M6 | 1       | 0         |
| Glioma Signaling                                                 | 1,84        | 0,055 | PIK3R5,IGF1R,IRS2,PRKCZ,PRKCB,PDGFRB                                                 | 6     | M3 vs. M6 | 2       | 0         |
| CXCR4 Signaling                                                  | 1,84        | 0,049 | DOCK1,GNAS,GNAS15,PIK3R5,IRS2,PRKCZ,PRKCB                                            | 7     | M3 vs. M6 | 2       | 0         |
| JAK/Stat Signaling                                               | 1,81        | 0,062 | PIK3R5,STAT2,IRS2,IL6,STAT3                                                          | 5     | M3 vs. M6 | 1       | 0,20      |
| Prolactin Signaling                                              | 1,81        | 0,062 | PIK3R5,IRS2,STAT3,PRKCZ,PRKCB                                                        | 5     | M3 vs. M6 | 2       | 0         |
| GNRH Signaling                                                   | 1,81        | 0,049 | GNAS,GNAS15,PRKAG2,MAPK13,CREB5,PRKCZ,PRKCB                                          | 7     | M3 vs. M6 | 3       | 0         |
| Role of Tissue Factor in Cancer                                  | 1,80        | 0,054 | LCK,GNAS15,PIK3R5,IRS2,MAPK13,RP56KA2                                                | 6     | M3 vs. M6 | 1       | 0         |
| Natural Killer Cell Signaling                                    | 1,80        | 0,054 | LCK,PIK3R5,IRS2,PRKCZ,INPP5D,PRKCB                                                   | 6     | M3 vs. M6 | 2       | 0         |
| Fc Epsilon RI Signaling                                          | 1,79        | 0,053 | PIK3R5,IRS2,MAPK13,PRKCZ,INPP5D,PRKCB                                                | 6     | M3 vs. M6 | 2       | 0         |
| NF-kB Activation by Viruses                                      | 1,73        | 0,059 | LCK,PIK3R5,IRS2,PRKCZ,PRKCB                                                          | 5     | M3 vs. M6 | 2       | 0         |
| LPS-stimulated MAPK Signaling                                    | 1,73        | 0,059 | PIK3R5,IRS2,MAPK13,PRKCZ,PRKCB                                                       | 5     | M3 vs. M6 | 2       | 0         |
| GPCR-Mediated Nutrient Sensing in Enteroendocrine Cells          | 1,73        | 0,059 | GNAS,GNAS15,PRKAG2,PRKCZ,PRKCB                                                       | 5     | M3 vs. M6 | 3       | 0         |
| B Cell Receptor Signaling                                        | 1,72        | 0,043 | APBB1P,PIK3R5,NFATC2,IRS2,MAPK13,CREB5,INPP5D,PRKCB                                  | 8     | M3 vs. M6 | 1       | 0         |
| CCR3 Signaling in Eosinophils                                    | 1,72        | 0,051 | GNAS,PIK3R5,IRS2,MAPK13,PRKCZ,PRKCB                                                  | 6     | M3 vs. M6 | 2       | 0         |
| Breast Cancer Regulation by Stathmin1                            | 1,71        | 0,043 | GNAS,PPM1L,PRKAG2,PIK3R5,IRS2,ARHGFE10,PRKCZ,PRKCB                                   | 8     | M3 vs. M6 | 2       | 0         |
| Aldosterone Signaling in Epithelial Cells                        | 1,71        | 0,046 | ASIC2,DNAJC5,DNAJC8,PIK3R5,IRS2,PRKCZ,PRKCB                                          | 7     | M3 vs. M6 | 2       | 0         |
| PAK Signaling                                                    | 1,69        | 0,058 | ARHGAP10,PIK3R5,IRS2,EPHA3,PDGFRB                                                    | 5     | M3 vs. M6 | 1       | 0         |
| fMLP Signaling in Neutrophils                                    | 1,69        | 0,050 | GNAS,PIK3R5,NFATC2,IRS2,PRKCZ,PRKCB                                                  | 6     | M3 vs. M6 | 2       | 0         |
| IL-6 Signaling                                                   | 1,67        | 0,050 | PIK3R5,IRS2,IL6,IL1RAPL1,MAPK13,STAT3                                                | 6     | M3 vs. M6 | 1       | 0,17      |
| CDK5 Signaling                                                   | 1,67        | 0,057 | GNAS,PPP1R1B,PPM1L,PRKAG2,MAPK13                                                     | 5     | M3 vs. M6 | 3       | 0         |
| Adrenomedullin signaling pathway                                 | 1,66        | 0,029 | C3,MAPK14,KCNQ2,PIK3R5,KCNN2                                                         | 5     | BL vs. M3 | 1       | 0,20      |
| p70S6K Signaling                                                 | 1,66        | 0,050 | PPM1L,PIK3R5,IRS2,PRKCZ,PLD1,PRKCB                                                   | 6     | M3 vs. M6 | 2       | 0         |
| P2Y Purigenic Receptor Signaling Pathway                         | 1,64        | 0,049 | PRKAG2,PIK3R5,IRS2,CREB5,PRKCZ,PRKCB                                                 | 6     | M3 vs. M6 | 2       | 0         |
| ErbB Signaling                                                   | 1,62        | 0,055 | PIK3R5,IRS2,MAPK13,PRKCZ,PRKCB                                                       | 5     | M3 vs. M6 | 2       | 0         |
| PI3K Signaling in B Lymphocytes                                  | 1,61        | 0,048 | C3,NFATC2,IRS2,PRKCZ,INPP5D,PRKCB                                                    | 6     | M3 vs. M6 | 3       | 0         |
| AMPK Signaling                                                   | 1,60        | 0,041 | GNAS,PPM1L,PRKAG2,PIK3R5,RPTOR,IRS2,MAPK13,CREB5                                     | 8     | M3 vs. M6 | 1       | 0         |
| Fcγ Receptor-mediated Phagocytosis in Macrophages and Monoc      | 1,60        | 0,054 | DOCK1,PRKCZ,PLD1,INPP5D,PRKCB                                                        | 5     | M3 vs. M6 | 3       | 0         |
| Huntington's Disease Signaling                                   | 1,59        | 0,039 | DNAJC5,GNAS15,PIK3R5,IGF1R,DNM3,IRS2,CREB5,PRKCZ,PRKCB                               | 9     | M3 vs. M6 | 1       | 0         |
| Role of Pattern Recognition Receptors in Recognition of Bacteria | 1,55        | 0,047 | C3,PIK3R5,IRS2,IL6,PRKCZ,PRKCB                                                       | 6     | M3 vs. M6 | 2       | 0,17      |
| Cardiac Hypertrophy Signaling                                    | 1,50        | 0,039 | GNAS,GNAS15,PRKAG2,PIK3R5,IGF1R,IRS2,IL6,MAPK13                                      | 8     | M3 vs. M6 | 1       | 0,13      |
| UVA-Induced MAPK Signaling                                       | 1,50        | 0,051 | PIK3R5,IRS2,MAPK13,RP56KA2,RP56KC1                                                   | 5     | M3 vs. M6 | 1       | 0         |
| G Beta Gamma Signaling                                           | 1,50        | 0,051 | GNAS,GNAS15,PRKAG2,PRKCZ,PRKCB                                                       | 5     | M3 vs. M6 | 3       | 0         |
| Type II Diabetes Mellitus Signaling                              | 1,49        | 0,046 | PPARG,PRKAG2,PIK3R5,IRS2,PRKCZ,PRKCB                                                 | 6     | M3 vs. M6 | 2       | 0         |
| Xenobiotic Metabolism Signaling                                  | 1,48        | 0,037 | AHRR,PPM1L,PIK3R5,IRS2,IL6,MAPK13,CYP2B6,PRKCZ,PRKCB                                 | 9     | M3 vs. M6 | 1       | 0,11      |
| G-Protein Coupled Receptor Signaling                             | 1,45        | 0,036 | GNAS,GNAS15,HTR7,PRKAG2,PIK3R5,IRS2,STAT3,CREB5,PRKCB                                | 9     | M3 vs. M6 | 1       | 0         |
| NF-kB Signaling                                                  | 1,45        | 0,041 | LCK,PIK3R5,IGF1R,IRS2,PRKCZ,PRKCB,PDGFRB                                             | 7     | M3 vs. M6 | 2       | 0         |
| Opioid Signaling Pathway                                         | 1,43        | 0,038 | LCK,GNAS,PRKAG2,GRK5,RP56KA2,CREB5,PRKCZ,PRKCB                                       | 8     | M3 vs. M6 | 3       | 0         |
| Paxillin Signaling                                               | 1,42        | 0,049 | DOCK1,ACTN2,PIK3R5,IRS2,MAPK13                                                       | 5     | M3 vs. M6 | 1       | 0         |
| Neuropathic Pain Signaling In Dorsal Horn Neurons                | 1,42        | 0,049 | PRKAG2,PIK3R5,IRS2,PRKCZ,PRKCB                                                       | 5     | M3 vs. M6 | 2       | 0         |
| Phospholipase C Signaling                                        | 1,42        | 0,038 | LCK,GNAS,NFATC2,CREB5,ARHGFE10,PRKCZ,PLD1,PRKCB                                      | 8     | M3 vs. M6 | 3       | 0         |
| Relaxin Signaling                                                | 1,41        | 0,044 | GNAS,GNAS15,PRKAG2,PIK3R5,IRS2,PRKCZ                                                 | 6     | M3 vs. M6 | 2       | 0         |
| Production of Nitric Oxide and Reactive Oxygen Species in Macro  | 1,40        | 0,040 | PPM1L,PIK3R5,IRS2,MAPK13,PRKCZ,PRKCB,APOD                                            | 7     | M3 vs. M6 | 2       | 0         |
| Sperm Motility                                                   | 1,40        | 0,048 | PRKG1,GNAS,PRKAG2,PRKCZ,PRKCB                                                        | 5     | M3 vs. M6 | 3       | 0         |
| Signaling by Rho Family GTPases                                  | 1,37        | 0,037 | GNAS,CDH18,GNAS15,PIK3R5,IRS2,ARHGFE10,PRKCZ,PLD1                                    | 8     | M3 vs. M6 | 1       | 0         |
| Glucocorticoid Receptor Signaling                                | 1,35        | 0,033 | PRKAG2,PIK3R5,NFATC2,TAT,IRS2,IL6,MAPK13,STAT3,KRT20,TSC22D3                         | 10    | M3 vs. M6 | 1       | 0,10      |
| Systemic Lupus Erythematosus Signaling                           | 1,35        | 0,039 | SNRPN,LCK,PIK3R5,NFATC2,IRS2,INPP5D                                                  | 7     | M3 vs. M6 | 1       | 0,14      |
| Hepatic Cholestasis                                              | 1,34        | 0,042 | PRKAG2,NR1H3,IL6,IL1RAPL1,PRKCZ,PRKCB                                                | 6     | M3 vs. M6 | 3       | 0,17      |
| p38 MAPK Signaling                                               | 1,33        | 0,046 | IL1RAPL1,MAPK13,RP56KA2,CREB5,RP56KC1                                                | 5     | M3 vs. M6 | 1       | 0         |
| Synaptic Long Term Potentiation                                  | 1,31        | 0,046 | GNAS15,PRKAG2,CREB5,PRKCZ,PRKCB                                                      | 5     | M3 vs. M6 | 3       | 0         |

Supplementary Table 2. Canonical pathways affected by differentially methylated genes in CD14+ monocytes after treatment with DMF.

DMF: Dimethyl fumarate; BL: baseline; M3: 3 months after initiation of DMF treatment; M6: 6 months after initiation of DMF treatment.

Input gene list was based on genes associated with differentially methylated probes that displayed  $\Delta b > 5\%$  methylation change and  $p\text{-value} < 0.001$ .

The table includes all canonical pathways from Ingenuity Pathway Analysis with Fisher's  $p\text{-value} < 0.05$  and number of molecules  $\geq 5$

ROS score indicates % overlap with a list of assembled known ROS genes:

|          |         |        |           |              |         |           |           |
|----------|---------|--------|-----------|--------------|---------|-----------|-----------|
| ACADL    | CD83    | ELK1   | HADHB     | IL6          | MYC     | SDHB      | TNC       |
| ACADM    | CD84    | EPHA2  | HBEGF     | INHBA        | MYD88   | SDHC      | TNFAIP8   |
| ACADS    | CDC14C  | ETFDH  | HCAR2     | IRAK1        | NAIP    | SDHD      | TNFRSF11A |
| ACADVL   | CDC45   | FADD   | HGF       | IRAK4        | NCF2    | SERPINA1  | TNS1      |
| ACAT1    | CDHR1   | FAR1   | HIF1A     | IRF1         | NCF4    | SHC1      | TOLLIP    |
| ACO1     | CDKN1A  | FAR2   | HIF1A-AS1 | IRF2         | NFE2L2  | SHC3      | TPI1      |
| ACO2     | CDKN1B  | FAR2P2 | HLA-A     | IRF3         | NFE2L2  | SIRPA     | TRAF2     |
| ACOT9    | CDKN2B  | FCGR1A | HLA-B     | IRF9         | NFIX    | SIRPD     | TRAJ22    |
| ACSL1    | CES1    | FCGR3B | HLA-C     | ITGA2        | NFKB1   | SLC25A20  | TRAJ30    |
| ACSL3    | CES2    | FCGRT  | HLA-DOA   | ITGA7        | NKAPL   | SLC27A2   | TRAV13-1  |
| ACSL4    | CES3    | FDXR   | HLA-DRB1  | ITGAX        | NOD1    | SLC7A11   | TRAV38-1  |
| ACSL5    | CES4A   | FGF13  | HLA-F     | ITGB4        | NOG     | SMAD1     | TRAV4     |
| ACSL6    | CES5A   | FH     | HLA-L     | JUN          | NOS2    | SMAD2     | TRBJ2-3   |
| ADH7     | CLEC12B | FMO5   | HMGCL     | JUNB         | NOX1    | SMAD3     | TRBV5-1   |
| AGER     | CLEC4A  | FN1    | HMGCS2    | KLHDC10      | NOX3    | SMAD5     | TRGV5     |
| ALDH3A1  | CLEC4C  | FOS    | HMOX1     | KLHL1        | NOX4    | SMAD7     | TXN2      |
| APOBEC1  | CLEC4E  | FOXP3  | HSP90AA1  | LAX1         | NOX5    | SMAD9     | TXNRD1    |
| APOL3    | CLEC5A  | FPR1   | HSPA1A    | LCNL1        | NOXA1   | SOD1      | TXNRD2    |
| APOOL    | CLEC6A  | FPR2   | ICAM1     | LOC100287651 | NOXO1   | SOD2      | TXNRD3    |
| APP      | CLEC7A  | FPR3   | IDH2      | LPL          | NPL     | SOD3      | UGT1A1    |
| ARHGEF18 | CLUH    | FST    | IDH3A     | LTBP1        | NQO1    | SORBS1    | VASP      |
| ARHGEF7  | COL1A2  | FTL    | IDH3B     | LTBP2        | OGDH    | SOS1      | VAV1      |
| ATG4A    | CPT1A   | FYN    | IDH3G     | LTBP2        | OLR1    | SP1       | VAV2      |
| BCL2     | CPT2    | G6PD   | IFI27L1   | LY6G6D       | OXCT1   | SQSTM1    | VAV3      |
| BDH1     | CRAT    | GAS2L3 | IFNA1     | LY6H         | PC      | SRXN1     | VEGFA     |
| BLVRB    | CS      | GBP1   | IFNAR1    | LY9          | PCK2    | SSTR3     | XDH       |
| BMP4     | CSF2    | GCDH   | IFNAR2    | MAFF         | PDCD7   | STAT1     | ZYX       |
| BRAF     | CTH     | GCLC   | IFNB1     | MAFG         | PDGFB   | SUCLG1    |           |
| CAMK2N1  | CXCL10  | GCLM   | IFNG      | MAL          | PDHA1   | SUCLG2    |           |
| CAPNS1   | CXCL11  | GGT1   | IFNG-AS1  | MAOA         | PDP2    | TAP1      |           |
| CASP8    | CXCL9   | GK2    | IFNGR1    | MAP2K3       | PDPR    | TBK1      |           |
| CAT      | CYBA    | GPD2   | IFNGR2    | MAP2K6       | PECR    | TBRG4     |           |
| CAV1     | CYBB    | GPX1   | IGDCC4    | MAPK12       | PGD     | TCL1B     |           |
| CAV2     | CYP1A1  | GPX2   | IGHD      | MAPK14       | POLDIP2 | TERT      |           |
| CAV3     | CYP2A6  | GPX3   | IGKV1D-39 | MAPK15       | PPARD   | TGFA      |           |
| CBR1     | CYP4A11 | GRB2   | IGKV1D-8  | MAPK8        | PRDX1   | TGFB1     |           |
| CBR3     | DECR1   | GSR    | IGKV1OR-3 | MDFI         | PRDX6   | TGFB2     |           |
| CBS      | DLD     | GSTA1  | IGLV8-61  | MDH2         | PREX1   | TGFB2-AS1 |           |
| CCL5     | DLST    | GSTA2  | IL10      | ME1          | PSMB9   | TGFBR1    |           |
| CCND1    | DNAJB1  | GSTA3  | IL10RB    | MET          | PTGER1  | TGFBR2    |           |
| CCR6     | DOCK2   | GSTA4  | IL12A     | MGST1        | PTGR1   | TGFBR3    |           |
| CD11c    | DUOX1   | GSTM2  | IL12B     | MGST3        | PTK2    | THBS1     |           |
| CD14     | DUOX2   | GSTM3  | IL15      | MKI67        | PXN     | TIAM2     |           |
| CD19     | DUOXA1  | GSTM4  | IL17A     | MLYCD        | RAC1    | TIRAP     |           |
| CD1E     | DUOXA2  | GSTM5  | IL17D     | MMP1         | RAC2    | TLR2      |           |
| CD38     | ECHS1   | GSTP1  | IL17RE    | MMP12        | SCP2    | TLR4      |           |
| CD40     | ECI1    | GSTT1  | IL19      | MPST         | SDHAF2  | TLR5      |           |
| CD47     | EGR1    | GSTT2  | IL1A      | MST1R        | SDHAP1  | TLR6      |           |
| CD5      | EHHADH  | HADH   | IL1B      | MT1X         | SDHAP2  | TLR9      |           |
| CD69     | EIF2AK2 | HADHA  | IL23A     | MTFR1        | SDHAP3  | TMEM8B    |           |

Supplementary Table 3. Canonical pathways affected by differentially methylated genes in CD4+ T-cells after treatment with DMF.

| Ingenuity-LOG(p-val) | Ratio | Molecule    | mol | Group     | Cluster | ROS Score |
|----------------------|-------|-------------|-----|-----------|---------|-----------|
| 1D-myo-ii,43         | 0,294 | ITPK1,ITP5  |     | BL vs. M6 | 1       | 0         |
| 3-phosph2,10         | 0,190 | FYN,PTPN35  |     | M3 vs. M4 |         | 0,06      |
| 3-phosph1,77         | 0,168 | G6PC2,NL31  |     | BL vs. M6 |         | 0,03      |
| 3-phosph2,26         | 0,204 | PTPN2,NL29  |     | M3 vs. M4 |         | 0         |
| 3-phosph2,58         | 0,197 | G6PC2,NL28  |     | BL vs. M6 |         | 0         |
| Amyloid F1,83        | 0,234 | PRKACB,#11  |     | BL vs. M6 |         | 0,18      |
| Androgen1,49         | 0,174 | PRKACB,C21  |     | BL vs. M6 |         | 0,14      |
| Apoptosis1,48        | 0,183 | GAS2,MA17   |     | BL vs. M6 |         | 0,29      |
| ATM Sign2,64         | 0,237 | MAP2K4,I22  |     | M3 vs. M5 |         | 0         |
| Axonal G1,40         | 0,157 | PRKACB,#62  |     | M3 vs. M5 |         | 0,08      |
| Axonal G1,72         | 0,149 | DPYSL2,P159 |     | BL vs. M6 |         | 0,05      |
| B Cell Rec1,68       | 0,166 | MAP2K6,I31  |     | BL vs. M6 |         | 0,26      |
| BMP sign1,41         | 0,189 | PRKACB,#14  |     | BL vs. M6 |         | 0,43      |
| Calcium S1,66        | 0,183 | PRKACB,#30  |     | M3 vs. M5 |         | 0         |
| Calcium S2,50        | 0,189 | PRKACB,#31  |     | BL vs. M6 |         | 0         |
| Calcium-ii,34        | 0,194 | CALM1 (v12) |     | BL vs. M6 |         | 0,08      |
| cAMP-me1,75          | 0,179 | AKAP12,P36  |     | M3 vs. M5 |         | 0         |
| cAMP-me3,52          | 0,199 | AKAP12,P40  |     | BL vs. M6 |         | 0         |
| Cardiac P'3,04       | 0,231 | AKAP12,P28  |     | M3 vs. M5 |         | 0         |
| Cardiac P'3,73       | 0,231 | AKAP12,P28  |     | BL vs. M6 |         | 0         |
| CD28 Sig1,34         | 0,181 | MAP2K4,I23  |     | M3 vs. M5 |         | 0,09      |
| CDK5 Sig2,23         | 0,223 | ITGB1,PR121 |     | M3 vs. M5 |         | 0         |
| CDK5 Sig2,04         | 0,202 | PRKACB,P19  |     | BL vs. M6 |         | 0,05      |
| Colorecta1,33        | 0,026 | JAK1,GAB6   |     | BL vs. M3 |         | 0         |
| Corticotrc1,39       | 0,185 | PRKACB,#22  |     | M3 vs. M5 |         | 0         |
| Corticotrc1,83       | 0,185 | NOS1,PRF22  |     | BL vs. M6 |         | 0         |
| CXCR4 Sig1,59        | 0,034 | DOCK1,PJ5   |     | BL vs. M3 |         | 0         |
| D-myo-in1,43         | 0,294 | ITPKB,INP5  |     | BL vs. M6 |         | 0         |
| D-myo-in2,29         | 0,209 | PTPN2,NL27  |     | M3 vs. M4 |         | 0         |
| D-myo-in2,27         | 0,194 | G6PC2,NL25  |     | BL vs. M6 |         | 0         |
| D-myo-in2,29         | 0,209 | PTPN2,NL27  |     | M3 vs. M4 |         | 0         |
| D-myo-in2,27         | 0,194 | G6PC2,NL25  |     | BL vs. M6 |         | 0         |
| D-myo-in2,17         | 0,201 | PTPN2,NL29  |     | M3 vs. M4 |         | 0         |
| D-myo-in2,20         | 0,188 | G6PC2,NL27  |     | BL vs. M6 |         | 0         |
| Dopamin1,43          | 0,209 | PRKACB,#14  |     | M3 vs. M5 |         | 0         |
| Dopamin3,92          | 0,284 | PRKACB,P19  |     | BL vs. M6 |         | 0,05      |
| Dopamin2,13          | 0,200 | PRKACB,#29  |     | M3 vs. M5 |         | 0         |
| Dopamin3,41          | 0,214 | NOS1,PRF31  |     | BL vs. M6 |         | 0         |
| Ephrin Re1,42        | 0,030 | PAK1,EPH5   |     | BL vs. M3 |         | 0         |
| Epithelial1,83       | 0,197 | TCF4,ARP25  |     | M3 vs. M5 |         | 0,04      |
| Epithelial1,78       | 0,181 | AKT2,TCF23  |     | BL vs. M6 |         | 0,13      |
| Fc Epsilon1,31       | 0,168 | MAP2K6,I20  |     | BL vs. M6 |         | 0,15      |
| FcRIIB S1,50         | 0,194 | MAP2K4,I14  |     | BL vs. M6 |         | 0,07      |
| FXR/RXR i2,37        | 0,053 | MLXIP1,S15  |     | BL vs. M3 |         | 0         |
| G Beta G1,73         | 0,202 | PRKACB,#21  |     | M3 vs. M5 |         | 0,05      |
| G Beta G2,20         | 0,202 | PRKACB,#21  |     | BL vs. M6 |         | 0,05      |
| GABA Rec3,55         | 0,286 | ADCY2,Uf20  |     | M3 vs. M5 |         | 0         |
| Gla12/13,1,91        | 0,041 | CDH18,GJ5   |     | BL vs. M3 |         | 0         |
| Gla1 Sign1,71        | 0,185 | PRKACB,#20  |     | BL vs. M6 |         | 0,05      |
| Glaq Sign1,35        | 0,163 | AKT2,HTR24  |     | BL vs. M6 |         | 0,13      |
| GNRH Sig1,57         | 0,033 | PAK1,MA5    |     | BL vs. M3 |         | 0         |
| GNRH Sig1,46         | 0,180 | MAP2K6,I27  |     | M3 vs. M5 |         | 0,15      |
| GNRH Sig1,48         | 0,167 | MAP2K6,I25  |     | BL vs. M6 |         | 0,28      |
| GP6 Sign1,96         | 0,042 | ITGA2B,G5   |     | BL vs. M3 |         | 0         |
| GP6 Sign3,10         | 0,218 | COL4A3,C26  |     | BL vs. M6 |         | 0,15      |
| GPCR-Me1,53          | 0,188 | PRKACB,#16  |     | BL vs. M6 |         | 0         |
| Hepatic C1,68        | 0,174 | MAP2K4,I25  |     | BL vs. M6 |         | 0,20      |
| Hereditar1,54        | 0,184 | NPM1,AR26   |     | M3 vs. M5 |         | 0         |
| HGF Sign2,71         | 0,052 | DOCK1,PJ6   |     | BL vs. M3 |         | 0         |
| HIPPO sig1,36        | 0,198 | SMAD2,V16   |     | M3 vs. M5 |         | 0,25      |
| HIPPO sig2,80        | 0,235 | SMAD2,P19   |     | BL vs. M6 |         | 0,21      |
| Huntingt2,02         | 0,167 | MAP2K4,I39  |     | BL vs. M6 |         | 0,05      |
| Iz-Adren1,33         | 0,181 | PRKACB,#15  |     | BL vs. M6 |         | 0         |
| IL-15 Prox3,07       | 0,375 | PTK2,PRK9   |     | BL vs. M6 |         | 1         |
| IL-15 Sign1,45       | 0,188 | IL15RA,A115 |     | BL vs. M6 |         | 0,47      |
| IL-17A Sig1,68       | 0,200 | MAP2K4,I15  |     | BL vs. M6 |         | 0,33      |
| IL-22 Sign1,83       | 0,292 | MAP2K4,I7   |     | BL vs. M6 |         | 0,14      |
| IL-6 Sign1,32        | 0,167 | MAP2K6,I21  |     | BL vs. M6 |         | 0,29      |
| ILK Sign1,41         | 0,030 | DOCK1,GJ5   |     | BL vs. M3 |         | 0         |
| Insulin Re1,46       | 0,169 | PRKACB,P23  |     | BL vs. M6 |         | 0,04      |
| Leukocyte1,46        | 0,159 | MAP2K4,I31  |     | BL vs. M6 |         | 0,23      |
| Melanin2,60          | 0,242 | MAP2K6,I16  |     | BL vs. M6 |         | 0,06      |
| Molecular2,13        | 0,171 | MAP2K4,I62  |     | M3 vs. M5 |         | 0,21      |
| Molecular1,94        | 0,154 | MAP2K4,I56  |     | BL vs. M6 |         | 0,21      |
| Netrin Sig3,88       | 0,327 | PRKACB,R17  |     | M3 vs. M5 |         | 0         |
| Netrin Sig3,84       | 0,308 | PRKACB,R16  |     | BL vs. M6 |         | 0         |
| Neuroin1,2,14        | 0,178 | MAP2K4,I49  |     | M3 vs. M5 |         | 0,24      |
| Neuroin1,1,52        | 0,153 | MAP2K4,I42  |     | BL vs. M6 |         | 0,38      |
| Nitric Oxi1,72       | 0,188 | PRKACB,#19  |     | BL vs. M6 |         | 0,05      |
| nNOS Sig3,04         | 0,295 | NOS1,CA113  |     | BL vs. M6 |         | 0         |
| nNOS Sig2,03         | 0,300 | SMTB2,RV9   |     | M3 vs. M5 |         | 0         |
| nNOS Sig1,78         | 0,267 | NOS1,CA18   |     | BL vs. M6 |         | 0         |
| Opioid Sig2,63       | 0,195 | MAP2K6,I42  |     | M3 vs. M5 |         | 0,07      |
| Opioid Sig2,92       | 0,186 | MAP2K6,I40  |     | BL vs. M6 |         | 0,10      |
| Pavillin Sig2,12     | 0,046 | DOCK1,PJ5   |     | BL vs. M3 |         | 0         |
| Phototr2,15          | 0,270 | PRKACB,C10  |     | BL vs. M6 |         | 0         |
| PI3K/AKT 1,91        | 0,041 | JAK1,FOX5   |     | BL vs. M3 |         | 0,20      |
| PI3K/AKT 1,73        | 0,195 | ITGB1,GA24  |     | M3 vs. M5 |         | 0,08      |
| PPAR $\alpha$ /R1,34 | 0,160 | MAP2K6,I26  |     | BL vs. M6 |         | 0,31      |
| Productio1,80        | 0,170 | MAP2K4,I30  |     | BL vs. M6 |         | 0,20      |
| Protein K12,36       | 0,176 | PRKACB,P60  |     | M3 vs. M5 |         | 0,03      |
| Protein K12,93       | 0,170 | PRKACB,P58  |     | BL vs. M6 |         | 0,09      |
| PTEN Sig1,94         | 0,203 | ITGB1,M24   |     | M3 vs. M5 |         | 0,17      |
| PXR/RXR i2,41        | 0,255 | PRKACB,#13  |     | BL vs. M6 |         | 0,08      |
| Rac Sign1,46         | 0,188 | ITGB1,M22   |     | M3 vs. M5 |         | 0,27      |
| Rac Sign2,21         | 0,197 | MAP2K4,I23  |     | BL vs. M6 |         | 0,48      |
| RAR Actv1,97         | 0,175 | MAP2K4,I30  |     | BL vs. M6 |         | 0,27      |
| Relaxin S1,40        | 0,167 | PRKACB,#23  |     | BL vs. M6 |         | 0,13      |
| Renin-Ang1,67        | 0,181 | MAP2K4,I21  |     | BL vs. M6 |         | 0,38      |
| Role of Bf2,64       | 0,250 | IFNG,RBL19  |     | M3 vs. M5 |         | 0,05      |
| Role of Bf1,33       | 0,184 | RBL2,RBB14  |     | BL vs. M6 |         | 0         |
| Role of C1,77        | 0,236 | RPA1,PPP13  |     | M3 vs. M5 |         | 0         |
| Role of JA1,73       | 0,280 | MAP2K4,I7   |     | BL vs. M6 |         | 0,29      |
| Role of JA2,27       | 0,348 | IFNG,PTP8   |     | M3 vs. M5 |         | 0,13      |
| Role of N13,71       | 0,203 | MAP2K6,I40  |     | BL vs. M6 |         | 0,08      |
| Role of O:1,99       | 0,033 | FOXO1,GJ7   |     | BL vs. M3 |         | 0         |
| Role of P1,41        | 0,220 | MAP2K6,I9   |     | BL vs. M6 |         | 0,89      |
| Sertoli Ce2,08       | 0,180 | MAP2K4,I29  |     | BL vs. M6 |         | 0,07      |
| Signaling 1,45       | 0,028 | PAK1,CDH6   |     | BL vs. M3 |         | 0         |
| Sonic Hed2,07        | 0,296 | PRKACB,P8   |     | BL vs. M6 |         | 0         |
| Sperm M1,73          | 0,202 | PNPLA8,P21  |     | M3 vs. M5 |         | 0,10      |
| Sperm M1,33          | 0,173 | PRKACB,C18  |     | BL vs. M6 |         | 0,11      |
| Superspat1,49        | 0,273 | IMPAD1,I6   |     | BL vs. M6 |         | 0         |
| Superspat1,62        | 0,175 | FYN,PTPN37  |     | M3 vs. M4 |         | 0,05      |
| Superspat1,60        | 0,160 | G6PC2,NL34  |     | BL vs. M6 |         | 0,03      |
| Synaptic I3,44       | 0,228 | GRID2,PLJ4  |     | M3 vs. M5 |         | 0         |
| Synaptic I1,75       | 0,174 | NOS1,GR126  |     | BL vs. M6 |         | 0         |
| Synaptic I1,75       | 0,184 | PRKACB,P21  |     | BL vs. M6 |         | 0         |
| Tec Kinase1,52       | 0,032 | PAK1,JAK5   |     | BL vs. M3 |         | 0         |
| Telomera1,79         | 0,202 | HDAC9,H122  |     | M3 vs. M5 |         | 0,05      |
| Tight Jun1,60        | 0,173 | PRKACB,C24  |     | BL vs. M6 |         | 0,13      |
| Type I Dia2,19       | 0,048 | JAK1,HLA5   |     | BL vs. M3 |         | 0,20      |
| Type II Di:1,78      | 0,038 | GAB1,SH:5   |     | BL vs. M3 |         | 0         |
| Type II Di:1,36      | 0,167 | MAP2K4,I22  |     | BL vs. M6 |         | 0,36      |

Supplementary Table 3. Canonical pathways affected by differentially methylated genes in CD4+ T-cells after treatment with DMF.

DMF: Dimethyl fumarate; BL: baseline; M3: 3 months after initiation of DMF treatment; M6: 6 months after initiation of DMF treatment.  
 Input gene list was based on genes associated with differentially methylated probes that displayed delta b > 5% methylation change and p-value < 0.001.  
 The table includes all canonical pathways from Ingenuity Pathway Analysis with Fisher's p-value < 0.05 and number of molecules  $\geq$  5.

**Supplementary Table 4. Functions affected by differentially methylated genes in CD4+ T-cells after treatment with DMF.**

| Categories                                                                                                    | Diseases or Functions Annotation                      | P-val    | Molecules           | N mol | Group     |
|---------------------------------------------------------------------------------------------------------------|-------------------------------------------------------|----------|---------------------|-------|-----------|
| Hematological System Development and Function, Tissue Morphology                                              | Quantity of mononuclear leukocytes                    | 3,90E-02 | CDK6,CHST2,CXCL18   |       | BL vs. M3 |
| Cell Death and Survival                                                                                       | Apoptosis of B lymphocytes                            | 1,65E-02 | BCL11A,BCL2A1,B26   |       | BL vs. M6 |
| Cell Death and Survival                                                                                       | Apoptosis of B-lymphocyte derived cell lines          | 1,65E-02 | BCL2A1,BCR,BLK,(24  |       | BL vs. M6 |
| Cell Death and Survival                                                                                       | Apoptosis of leukocyte cell lines                     | 4,56E-02 | BCL2A1,BCR,BLK,(32  |       | BL vs. M6 |
| Cell Cycle                                                                                                    | Arrest in G1 phase                                    | 2,01E-02 | BCR,DCN,FOXO1,(8    |       | BL vs. M6 |
| Cell Cycle                                                                                                    | Arrest in G1 phase of B-lymphocyte derived cell lines | 6,35E-03 | BCR,FOXO1,GRID:6    |       | BL vs. M6 |
| Infectious Diseases                                                                                           | Bacterial Infections                                  | 2,86E-02 | CASP1,CASP4,CSK 5   |       | BL vs. M6 |
| Cell Death and Survival                                                                                       | Cell death of B-lymphocyte derived cell lines         | 1,65E-02 | BCL2A1,BCR,BLK,(25  |       | BL vs. M6 |
| Cell Death and Survival                                                                                       | Cell death of leukocyte cell lines                    | 1,53E-02 | ANTXR1,BCL2A1,E39   |       | BL vs. M6 |
| Cellular Movement, Hematological System Development and Function                                              | Cell movement of naive lymphocytes                    | 1,21E-02 | BACH2,CCL20,CX6     |       | BL vs. M6 |
| Cellular Development, Cellular Growth and Proliferation, Hematological System Development and Function        | Cell proliferation of leukocyte cell lines            | 3,27E-02 | ABL2,BTCR,EBF1,LY7  |       | BL vs. M6 |
| Cellular Development, Hematological System Development and Function                                           | Commitment of lymphocytes                             | 6,35E-03 | DTX1,EBF1,IL6,PA 6  |       | BL vs. M6 |
| Cell Death and Survival                                                                                       | Delay in apoptosis of phagocytes                      | 1,59E-02 | CASP1,CASP4,IL6, 5  |       | BL vs. M6 |
| Cellular Development, Cellular Growth and Proliferation, Embryonic Development of B lymphocytes               | Development of B lymphocytes                          | 2,19E-02 | ADAM10,AFF1,AK28    |       | BL vs. M6 |
| Cellular Development, Cellular Growth and Proliferation, Embryonic Development of B-1 lymphocytes             | Development of B-1 lymphocytes                        | 1,71E-03 | AKT2,BTCR,EBF1,LY7  |       | BL vs. M6 |
| Cellular Development, Cellular Growth and Proliferation, Hematological System Development and Function        | Development of bone marrow-derived macrophages        | 4,00E-02 | AKAP13,CAV1,FOXO8   |       | BL vs. M6 |
| Cellular Development, Cellular Growth and Proliferation, Embryonic Development of follicular B lymphocytes    | Development of follicular B lymphocytes               | 1,17E-02 | ADAM10,AKT2,BT7     |       | BL vs. M6 |
| Cellular Development, Cellular Growth and Proliferation, Embryonic Development of marginal-zone B lymphocytes | Development of marginal-zone B lymphocytes            | 6,35E-03 | ADAM10,AKT2,BT6     |       | BL vs. M6 |
| Cellular Development, Cellular Growth and Proliferation, Embryonic Development of plasma cells                | Development of plasma cells                           | 2,86E-02 | BACH2,CXCL12,DIC5   |       | BL vs. M6 |
| Cellular Development, Cellular Growth and Proliferation, Hematological System Development and Function        | Differentiation of myeloid progenitor cells           | 4,84E-02 | BTK,FIP1L1,IL15,IL6 |       | BL vs. M6 |
| Cellular Development, Cellular Growth and Proliferation, Embryonic Development of naive lymphocytes           | Differentiation of naive lymphocytes                  | 4,55E-02 | AHR,BCL6,EFNB2, 12  |       | BL vs. M6 |
| Cellular Development, Cellular Growth and Proliferation, Embryonic Development of pro-B lymphocytes           | Differentiation of pro-B lymphocytes                  | 4,00E-02 | BLK,EBF1,ETV6,LY8   |       | BL vs. M6 |
| Cell-To-Cell Signaling and Interaction, Inflammatory Response                                                 | Immune response of leukocyte cell lines               | 4,84E-02 | APP,CD38,FOXO1, 6   |       | BL vs. M6 |
| Cell Cycle                                                                                                    | Interphase of leukocyte cell lines                    | 1,35E-02 | BCR,CXCL12,FOXO8    |       | BL vs. M6 |
| Cell Death and Survival                                                                                       | Killing of leukocyte cell lines                       | 4,00E-02 | CD22,EXOC2,IL15, 6  |       | BL vs. M6 |
| Cellular Movement, Hematological System Development and Function                                              | Migration of naive lymphocytes                        | 7,63E-03 | BACH2,CXCL12,CX5    |       | BL vs. M6 |
| Hematological System Development and Function, Lymphoid Tissue Morphology                                     | Morphology of lymph follicle                          | 8,88E-03 | BACH2,EP515,FN1 6   |       | BL vs. M6 |
| Cellular Development, Cellular Growth and Proliferation, Hematological System Development and Function        | Osteoclastogenesis of macrophages                     | 4,42E-02 | CAST,CAV1,DICER 9   |       | BL vs. M6 |
| Cellular Development, Cellular Growth and Proliferation, Hematological System Development and Function        | Osteoclastogenesis of phagocytes                      | 4,17E-02 | CAST,CAV1,DICER 10  |       | BL vs. M6 |
| Cell Morphology                                                                                               | Polarization of Th17 cells                            | 2,86E-02 | AHR,CD36,IL15,IL5   |       | BL vs. M6 |
| Hematological System Development and Function, Hypersensitivity                                               | Quantity of mast cells                                | 1,68E-02 | BCL2A1,CASP1,CA12   |       | BL vs. M6 |
| Hematological System Development and Function, Hematopoiesis                                                  | Quantity of pre-B lymphocytes                         | 2,30E-02 | AFF1,AKAP13,ARF 24  |       | BL vs. M6 |
| Cell Signaling, Small Molecule Biochemistry                                                                   | Synthesis of nitric oxide                             | 3,61E-02 | ALOX5,APP,BDNF, 17  |       | BL vs. M6 |
| Connective Tissue Disorders, Immunological Disease, Inflammatory Response                                     | Systemic juvenile idiopathic arthritis                | 2,81E-02 | ASAP1,ATP2B1,CA14   |       | BL vs. M6 |
| Gene Expression                                                                                               | Transactivation of RNA                                | 1,59E-02 | CD300LB,CD300L5     |       | BL vs. M6 |
| Cellular Movement, Hematological System Development and Function                                              | Transendothelial migration of lymphocytes             | 4,07E-02 | CAV1,CXCL12,ENF7    |       | BL vs. M6 |
| Cellular Movement, Hematological System Development and Function                                              | Transendothelial migration of mononuclear leukocytes  | 3,41E-02 | CAV1,CCL7,CXCL1 8   |       | BL vs. M6 |
| Cancer                                                                                                        | Transformation of B-lymphocyte derived cell lines     | 4,63E-02 | ETV6,FIP1L1,HIP1 5  |       | BL vs. M6 |
| Cell-mediated Immune Response, Cellular Development, Cellular Function and Maintenance                        | Transition of thymocytes                              | 1,13E-02 | BDNF,CHEK1,DOK5     |       | BL vs. M6 |
| Cellular Function and Maintenance                                                                             | Turnover of cells                                     | 2,16E-02 | CCL20,CD22,DICE15   |       | BL vs. M6 |
| Cell Morphology, Humoral Immune Response, Immunological Disease                                               | Abnormal morphology of B-1 lymphocytes                | 1,69E-02 | CARD11,CR2,EBF15    |       | M3 vs. M6 |
| Hematological System Development and Function, Immune Cell Trafficking                                        | Accumulation of regulatory T lymphocytes              | 3,21E-02 | EGRF,IFNG,IKKB, 6   |       | M3 vs. M6 |
| Cell-To-Cell Signaling and Interaction, Hematological System Development and Function                         | Activation of regulatory T lymphocytes                | 3,10E-02 | BACH2,BCL11B,CL9    |       | M3 vs. M6 |
| Cell Death and Survival                                                                                       | Apoptosis of B-lymphocyte derived cell lines          | 8,61E-03 | ABL1,BCL2,BCL2L:27  |       | M3 vs. M6 |
| Cell Death and Survival                                                                                       | Apoptosis of leukocyte cell lines                     | 1,05E-02 | ABL1,BCL2,BCL2L:38  |       | M3 vs. M6 |
| Cell Death and Survival                                                                                       | Apoptosis of thymocytes                               | 1,18E-02 | ABL1,BBC3,BCL11 29  |       | M3 vs. M6 |
| Cell Cycle                                                                                                    | Arrest in G1 phase of B-lymphocyte derived cell lines | 4,17E-02 | ABL1,BCR,GRID2,15   |       | M3 vs. M6 |
| Cell Death and Survival                                                                                       | Cell death of leukocyte cell lines                    | 2,70E-02 | ABL1,BCL2,BCL2L:41  |       | M3 vs. M6 |
| Cell Death and Survival                                                                                       | Cell death of monocyte-derived dendritic cells        | 1,43E-02 | BCL2,BCL2L1,IKKB 6  |       | M3 vs. M6 |
| Cell Death and Survival                                                                                       | Cell death of thymocytes                              | 2,11E-02 | ABL1,BBC3,BCL11 31  |       | M3 vs. M6 |
| Cellular Development, Cellular Growth and Proliferation, Hematological System Development and Function        | Cell proliferation of leukocyte cell lines            | 2,26E-03 | ABCA3,ABL1,ABL254   |       | M3 vs. M6 |
| Cell Death and Survival                                                                                       | Cell viability                                        | 2,43E-02 | ABL1,ADGRE2,API59   |       | M3 vs. M6 |
| Cell Death and Survival, Hematological System Development and Function                                        | Cell viability of B-lymphocyte derived cell lines     | 4,18E-02 | ABL1,BCL2,BCL2L:14  |       | M3 vs. M6 |
| Cell Death and Survival, Hematological System Development and Function                                        | Cell viability of leukocyte cell lines                | 3,82E-02 | ABL1,BCL2,BCL2L:17  |       | M3 vs. M6 |
| Cellular Function and Maintenance                                                                             | Cellular homeostasis                                  | 4,10E-02 | ABL1,ABL2,ADOR/126  |       | M3 vs. M6 |
| Cellular Development, Hematological System Development and Function                                           | Commitment of lymphocytes                             | 1,03E-02 | DTX1,EBF1,IL6,PA 6  |       | M3 vs. M6 |
| Cellular Development, Cellular Growth and Proliferation, Embryonic Development of B lymphocytes               | Development of B lymphocytes                          | 2,57E-02 | ARF1,BCL2,BCL2L:30  |       | M3 vs. M6 |
| Cellular Development, Cellular Growth and Proliferation, Embryonic Development of plasma cells                | Development of plasma cells                           | 4,17E-02 | CCR2,DICER1,IL21R 5 |       | M3 vs. M6 |
| Cellular Development, Cellular Growth and Proliferation, Embryonic Development of pro-B lymphocytes           | Development of pro-B lymphocytes                      | 3,75E-02 | BLK,FYN,IFNG,LYN 7  |       | M3 vs. M6 |
| Cellular Development, Cellular Growth and Proliferation, Embryonic Differentiation of pro-B lymphocytes       | Differentiation of pro-B lymphocytes                  | 9,17E-03 | BLK,EBF1,ETV6,FY 10 |       | M3 vs. M6 |
| Cellular Development, Cellular Growth and Proliferation, Hematological System Development and Function        | Expansion of hematopoietic progenitor cells           | 1,20E-02 | BCL2L1,EBF1,EOW8    |       | M3 vs. M6 |
| Cell-mediated Immune Response, Cellular Development, Cellular Function and Maintenance                        | Expansion of thymocytes                               | 1,91E-02 | EOMES,IKZF1,LCP 6   |       | M3 vs. M6 |
| Cellular Function and Maintenance                                                                             | Lymphocyte homeostasis                                | 2,49E-02 | ABL1,ABL2,ADOR/114  |       | M3 vs. M6 |
| Antigen Presentation, Cell-To-Cell Signaling and Interaction, Cellular Function and Maintenance               | Positive selection of thymocytes                      | 3,75E-02 | CADM1,ELK4,NF1 7    |       | M3 vs. M6 |
| Cellular Development, Cellular Growth and Proliferation, Hematological System Development and Function        | Proliferation of hematopoietic progenitor cells       | 4,42E-02 | BBC3,BCL2,BCL2L:25  |       | M3 vs. M6 |
| Cellular Development, Cellular Growth and Proliferation                                                       | Proliferation of myeloid cells                        | 2,53E-02 | CUX1,CYSLTR2,DC23   |       | M3 vs. M6 |
| Cell-mediated Immune Response, Cellular Development, Cellular Function and Maintenance                        | Proliferation of thymocytes                           | 3,34E-02 | BBC3,BLM,EGR3,F 18  |       | M3 vs. M6 |
| Hematological System Development and Function, Hypersensitivity                                               | Quantity of mast cells                                | 1,47E-02 | ATF3,CASP1,CASP 13  |       | M3 vs. M6 |
| Cell Cycle                                                                                                    | Replication of cells                                  | 1,43E-02 | CASP1,IFNG,NLRP 6   |       | M3 vs. M6 |
| Connective Tissue Disorders, Immunological Disease, Inflammatory Response                                     | Systemic juvenile idiopathic arthritis                | 1,38E-02 | ASAP1,ATP2B1,DC 16  |       | M3 vs. M6 |
| Cell-mediated Immune Response, Cellular Function and Maintenance                                              | T cell homeostasis                                    | 4,33E-02 | ABL1,ABL2,ADOR/106  |       | M3 vs. M6 |
| Cellular Function and Maintenance                                                                             | Turnover of cells                                     | 3,19E-02 | BCL2L1,CD22,DIC5    |       | M3 vs. M6 |



Supplementary Table 4. Functions affected by differentially methylated genes in CD4+ T-cells after treatment with DMF.

DMF: Dimethyl fumarate; BL: baseline; M3: 3 months after initiation of DMF treatment; M6: 6 months after initiation of DMF treatment.

Input gene list was based on genes associated with differentially methylated probes that displayed  $\Delta b > 5\%$  methylation change and  $p\text{-value} < 0.001$ .

The table includes all functional annotations from Ingenuity Pathway Analysis with Fisher's  $p\text{-value} < 0.05$  and number of molecules  $\geq 5$ .

**Supplementary Table 5. Upstream regulators predicted to explain a pattern of differentially methylated genes in CD4+ T-cells after treatment with DMF.**

| Upstream Regulator | Molecule Type                     | P-val    | Target molecules in dataset             | N mol | Group     |
|--------------------|-----------------------------------|----------|-----------------------------------------|-------|-----------|
| NOTCH2             | transcription regulator           | 7,64E-04 | DTX1,IL22,IL6,TNF,TSPAN33               | 5     | BL vs. M6 |
| EP300              | transcription regulator           | 2,64E-03 | ACOXL,AHI1,AKAP12,ARHGAP24,BCL6,BTK,C36 | 36    | BL vs. M6 |
| WNT3A              | cytokine                          | 2,83E-03 | IL6,NANOG,RUNX1,RUNX1T1,TNF             | 5     | BL vs. M6 |
| STAT5B             | transcription regulator           | 9,89E-03 | ASAP1,BCL6,CASP4,CASP6,CHEK1,EBF16      | 16    | BL vs. M6 |
| CREBBP             | transcription regulator           | 1,31E-02 | ACOXL,AHI1,AKAP12,ARHGAP24,BCL6,CA2,C34 | 34    | BL vs. M6 |
| GLI3               | transcription regulator           | 2,21E-02 | EBF1,FOXO1,IRF1,KLF13,PAX5,PTCH1,RUNX17 | 17    | BL vs. M6 |
| NOTCH1             | transcription regulator           | 2,70E-02 | ADAM19,ASB2,BCL6,IL22,IL6,TNF,TSPAN33   | 7     | BL vs. M6 |
| MAPK8              | kinase                            | 3,11E-02 | BCL2,DUSP1,EOMES,IFNG,IL6               | 5     | M3 vs. M6 |
| IL17A              | cytokine                          | 3,26E-02 | BCL2A1,CCL20,CD83,IL22,IL6,RGS13,TNF    | 7     | BL vs. M6 |
| VEGFA              | growth factor                     | 3,32E-02 | CD1A,EOMES,IFNG,IL6,ITGAV,KLRG1,NFATC28 | 28    | M3 vs. M6 |
| TCF3               | transcription regulator           | 3,39E-02 | CDC25B,CIP2A,FOXO1,SERINC5,TMEM184B     | 5     | BL vs. M3 |
| MED1               | transcription regulator           | 3,55E-02 | BCL11A,BCL6,EBF1,FOXO1,KLF13            | 5     | BL vs. M6 |
| NOTCH1             | transcription regulator           | 4,40E-02 | BCL2,BCL2L1,CFLAR,FLT1,IFNG,IL6,SMARCC1 | 7     | M3 vs. M6 |
| RORC               | ligand-dependent nuclear receptor | 4,65E-02 | CCL20,IL1R1,IL22,IL411,IL6,TNF          | 6     | BL vs. M6 |

Supplementary Table 5. Upstream regulators predicted to explain a pattern of differentially methylated genes in CD4+ T-cells after treatment with DMF.

DMF: Dimethyl fumarate; BL: baseline; M3: 3 months after initiation of DMF treatment; M6: 6 months after initiation of DMF treatment.

Input gene list was based on genes associated with differentially methylated probes that displayed  $\Delta b > 5\%$  methylation change and  $p\text{-value} < 0.001$ .

The table includes all upstream regulators from Ingenuity Pathway Analysis with  $p\text{-value of overlap} < 0.05$  and number of target molecules  $\geq 5$ .

Supplementary Table 6. Plasma cytokine profile

| Marker  | Responder |       | Non-responder |       | Responder |         | Non-responder |       | 6months  |       | 6months |          | 6months |         | 6months  |     |
|---------|-----------|-------|---------------|-------|-----------|---------|---------------|-------|----------|-------|---------|----------|---------|---------|----------|-----|
|         | Baseline  | ±SD   | n             | ±SD   | n         | 6months | ±SD           | n     | Baseline | ±SD   | n       | Baseline | ±SD     | n       | Baseline | ±SD |
| IL17C   | 0.536     | 0.625 | 29            | 0.365 | 0.497     | 29      | 0.861         | 0.565 | 11       | 0.397 | 0.474   | 11       | 0.176   | 0.0011  | -        | -   |
| IL17A   | 0.235     | 0.333 | 29            | 0.182 | 0.346     | 29      | 0.260         | 0.257 | 11       | 0.079 | 0.176   | 11       | 0.079   | -       | -        | -   |
| CCL28   | 0.889     | 0.223 | 29            | 0.084 | 0.397     | 29      | 1.171         | 0.430 | 11       | 1.166 | 0.358   | 11       | 1.166   | <0.0001 | -        | -   |
| CDCP1   | 1.654     | 0.549 | 29            | 1.874 | 0.519     | 29      | 1.563         | 0.396 | 11       | 1.971 | 0.599   | 11       | 1.971   | -       | -        | -   |
| EN-RAGE | 1.546     | 0.485 | 29            | 1.148 | 0.537     | 29      | 1.419         | 0.569 | 11       | 1.134 | 0.331   | 11       | 1.134   | -       | -        | -   |
| SLAMF   | 1.699     | 0.316 | 29            | 1.508 | 0.495     | 29      | 1.691         | 0.318 | 11       | 1.690 | 0.356   | 11       | 1.690   | -       | -        | -   |
| IL12B   | 4.628     | 0.759 | 29            | 5.130 | 0.662     | 29      | 4.784         | 0.491 | 11       | 5.100 | 0.364   | 11       | 5.100   | -       | -        | -   |
| IL18R   | 6.841     | 0.496 | 29            | 6.696 | 0.426     | 29      | 6.802         | 0.281 | 11       | 6.891 | 0.279   | 11       | 6.891   | 0.0081  | -        | -   |
| CXCL9   | 5.944     | 0.973 | 29            | 6.500 | 0.917     | 29      | 5.807         | 0.730 | 11       | 6.214 | 1.001   | 11       | 6.214   | 0.0026  | -        | -   |
| CCL4    | 6.229     | 0.695 | 29            | 6.459 | 0.608     | 29      | 6.198         | 0.501 | 11       | 6.364 | 0.584   | 11       | 6.364   | -       | -        | -   |
| TWEAK   | 8.567     | 0.328 | 29            | 8.407 | 0.307     | 29      | 8.701         | 0.377 | 11       | 8.550 | 0.319   | 11       | 8.550   | -       | -        | -   |

Supplementary Table 6. Plasma cytokine profile

The table provides statistics (student t-test/ paired t-test) in cytokine levels  
Additional Olink information could be found at <https://www.olink.com/>
